# Supplementary material for: Large difference in aerosol radiative effects from BVOC-SOA treatment in three ESMs
Source: Copernicus journal article supplement (doi:10.5194/acp-2019-1166), 2020-02-04
Supplement: Supplementary file 1 [file acp-2019-1166-supplement.pdf]

# Supplementary for: Large difference in aerosol radiative effects from BVOC-SOA treatment in three ESMs

Moa K. Sporre<sup>1,2</sup>, Sara M. Blichner<sup>1</sup>, Roland Schrödner<sup>3</sup>, Inger H. H. Karset<sup>1</sup>, Terje K. Berntsen<sup>1,4</sup>, Twan van Noije<sup>5</sup>, Tommy Bergman<sup>5,6</sup>, Declan O'Donnell<sup>7</sup>, and Risto Makkonen<sup>7,8</sup>

<sup>1</sup>Department of Geosciences, University of Oslo, Postboks 1022 Blindern, 0315 Oslo, Norway

<sup>2</sup>Now at: Department of Physics, Lund University, Box 118, 22100 Lund, Sweden

<sup>3</sup>Institute for Tropospheric Research, Permoserstr. 15, 04318 Leipzig, Germany

<sup>4</sup>CICERO Center for International Climate Research, Postboks 1129 Blindern, 0318 Oslo, Norway

<sup>5</sup>Royal Netherlands Meteorological Institute (KNMI), PO Box 201, 3730 AE De Bilt, the Netherlands

<sup>6</sup>Now at: Climate System Research, Finnish Meteorological Institute, P.O. Box 503, FI-00101, Helsinki, Finland

<sup>7</sup>Climate System Research, Finnish Meteorological Institute, P.O. Box 503, FI-00101, Helsinki, Finland

<sup>8</sup>Institute for Atmospheric and Earth System Research / Physics, Faculty of Science, University of Helsinki, P.O. Box 64, FI-00014, Finland

**Correspondence:** Moa Sporre (moa.sporre@nuclear.lu.se)

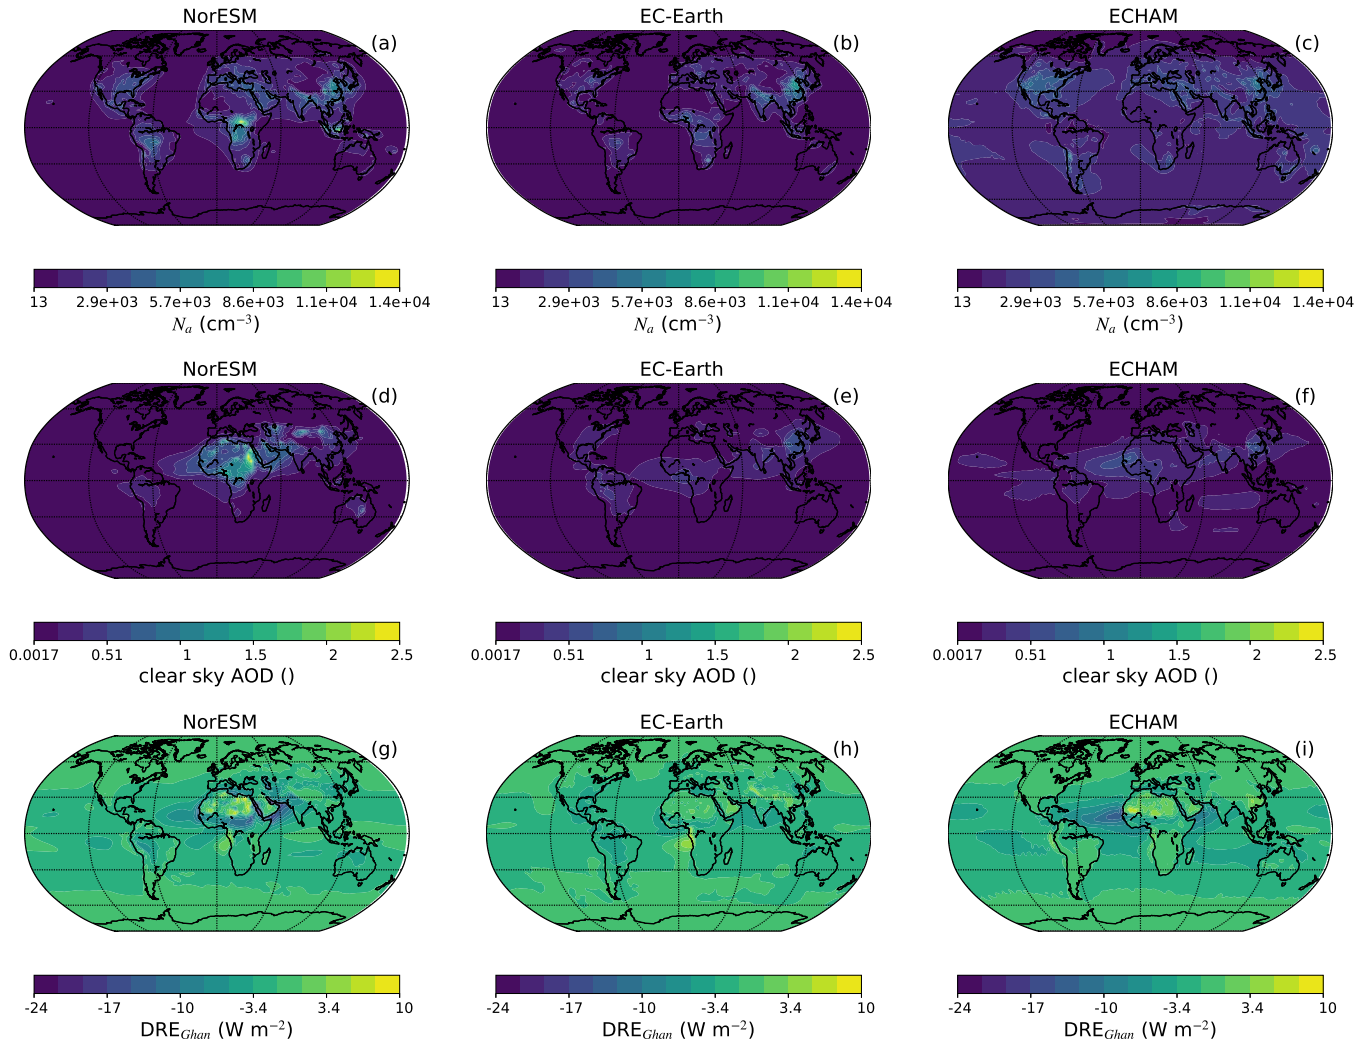

**Figure S1.** Maps of annually averaged total aerosol number concentration (a-c), clear sky aerosol optical depth (AOD) (d-f) and direct radiative effect ( $\text{DRE}_{Ghan}$ ) (g-i) for NorESM, EC-Earth and ECHAM.

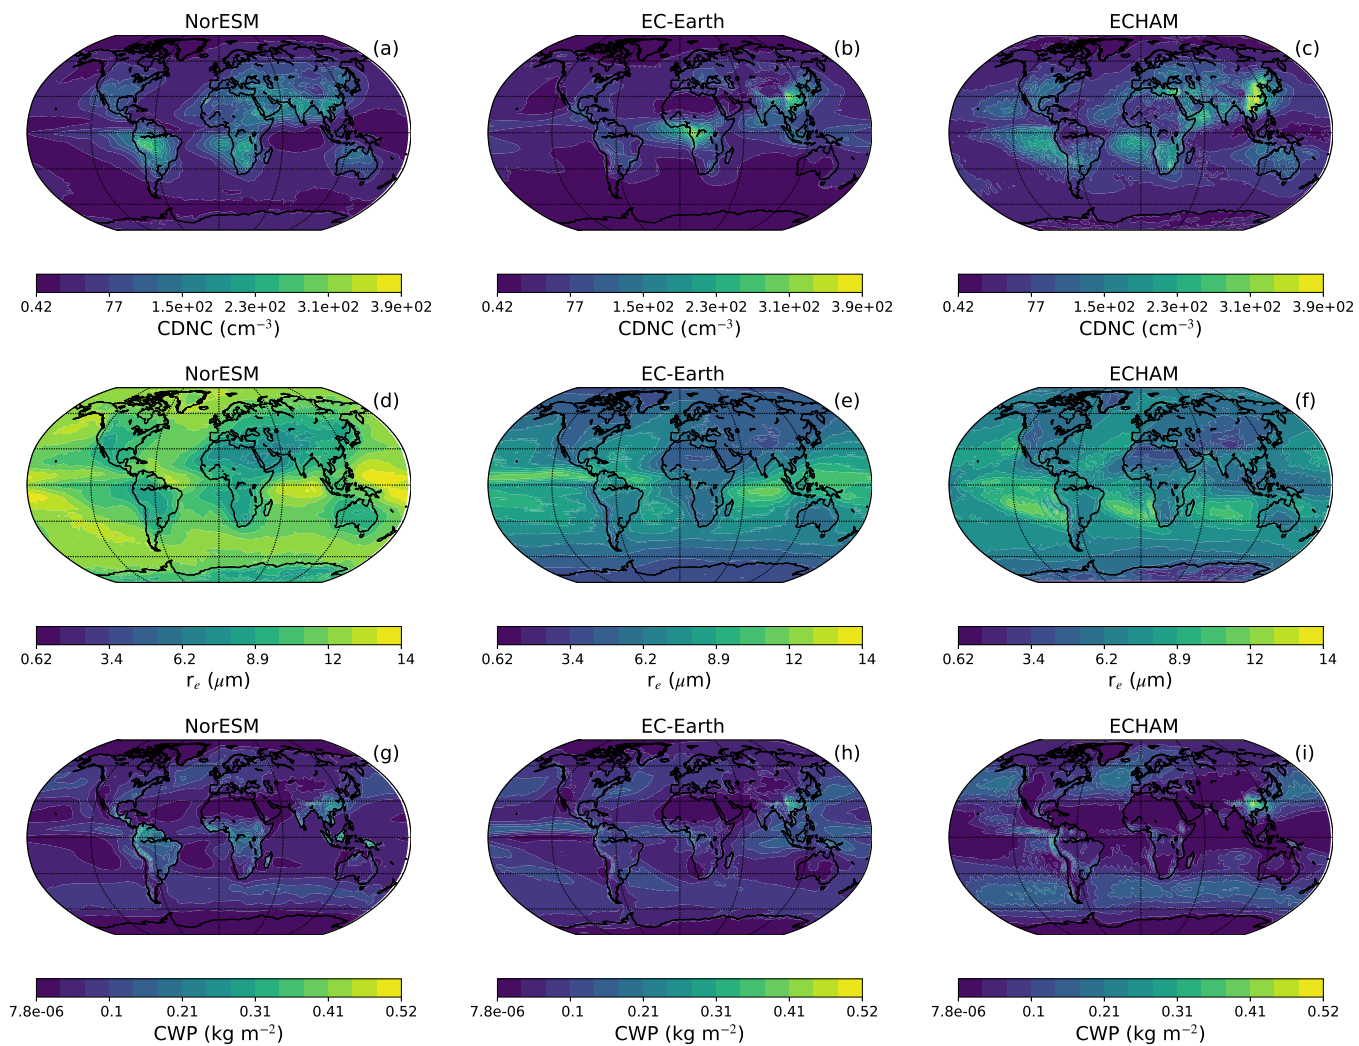

**Figure S2.** Maps of annually averaged in-cloud droplet number concentration (CDNC) at 860 hPa (a-c), in-cloud effective radius at 860 hPa ( $r_e$ ) (d-f) and total gridbox cloud water path (CWP) (g-i) for NorESM, EC-Earth and ECHAM.

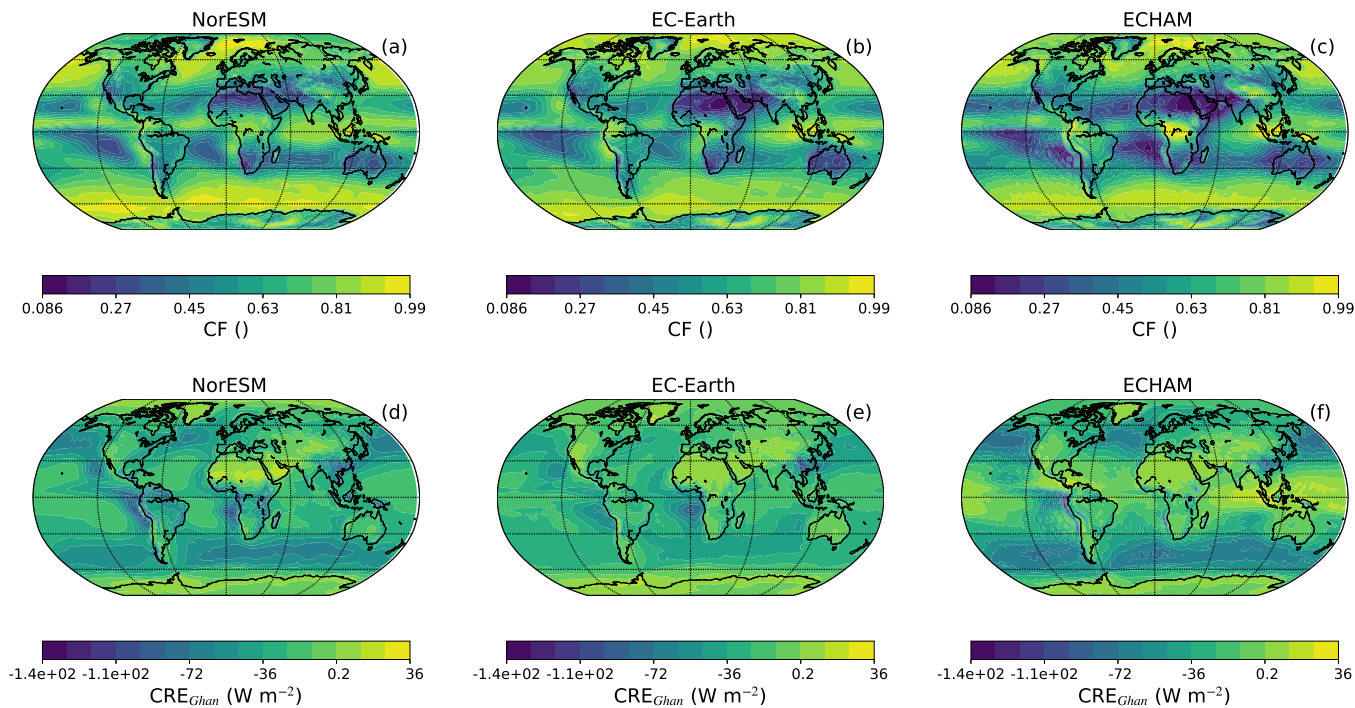

**Figure S3.** Maps of annually averaged cloud fraction (CF) (a-c) and cloud radiative effects ( $CRE_{Ghan}$ ) (d-f) for NorESM, EC-Earth and ECHAM.

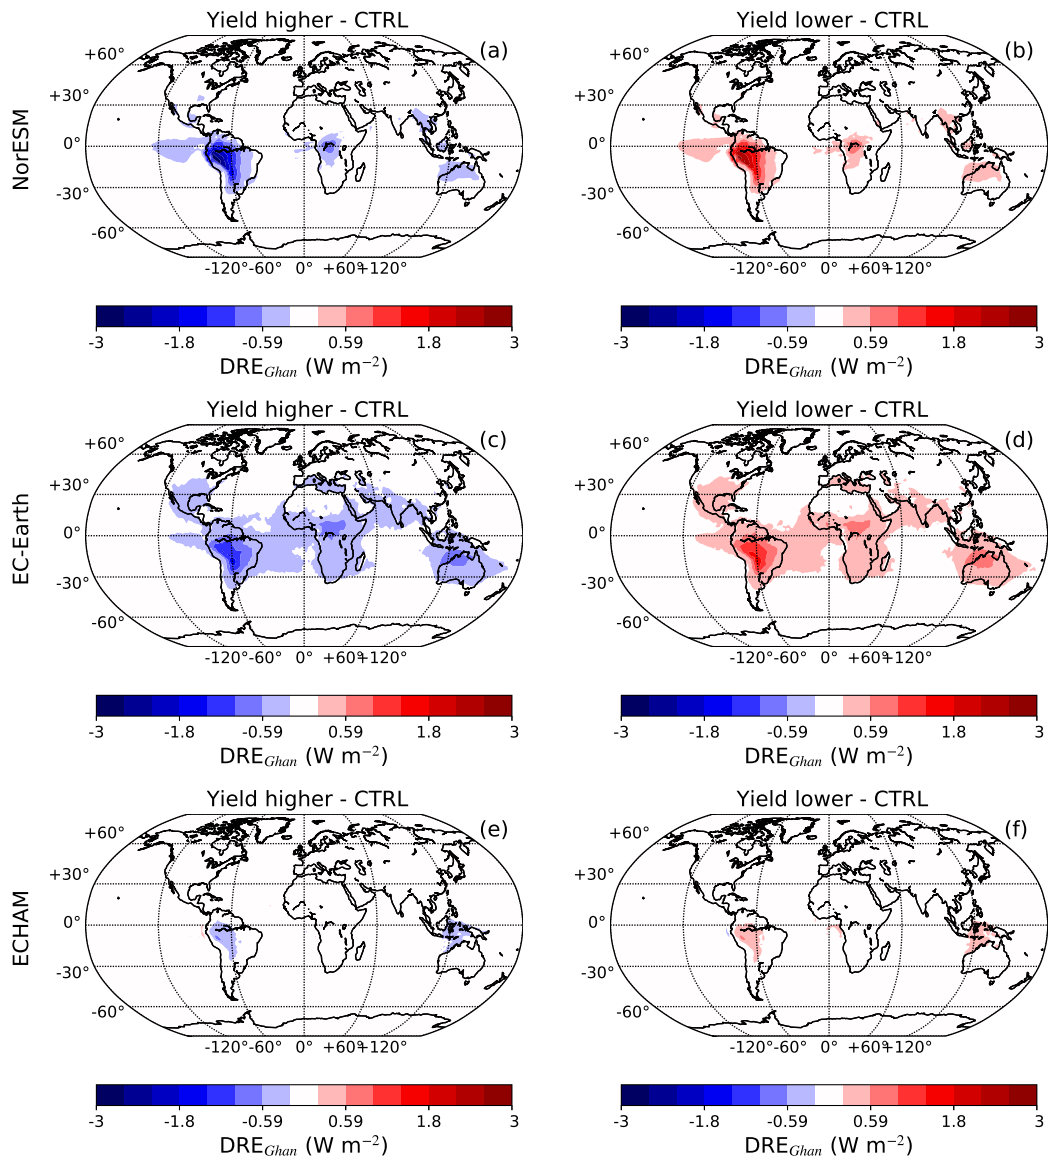

**Figure S4.** Maps of the difference in the average direct radiative effect ( $DRE_{Ghan}$ ) between the Yield higher (a, c and e) and Yield lower (b, d and f) with respect to the CTRL simulation. This is shown for NorESM (a and b), EC-Earth (c and d) and ECHAM (e and f).

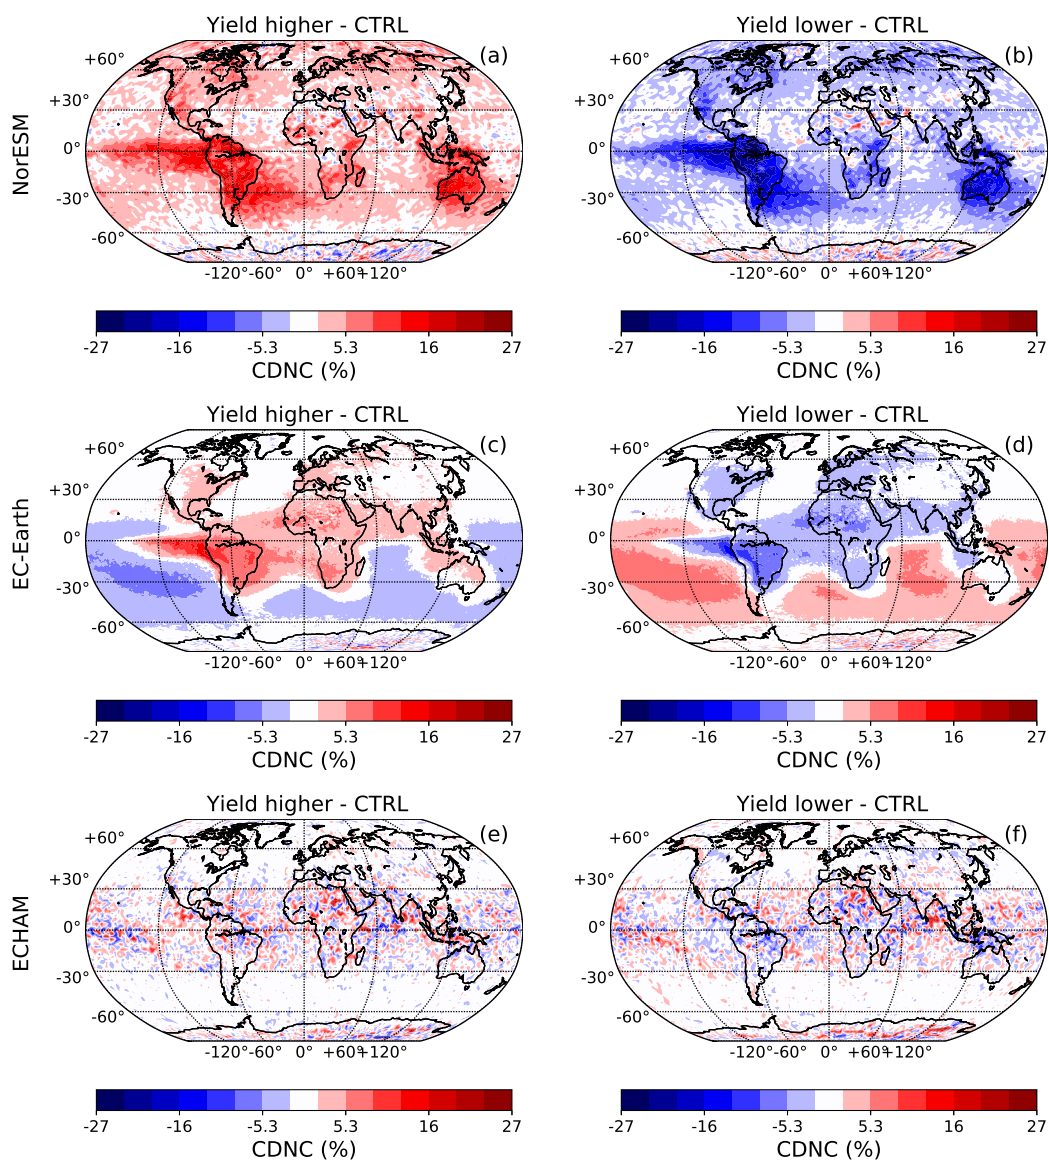

**Figure S5.** Maps of the difference in the average cloud droplet number concentration (CDNC) between the Yield higher (a, c and e) and Yield lower (b, d and f) with respect to the CTRL simulation. This is shown for NorESM (a and b), EC-Earth (c and d) and ECHAM (e and f).

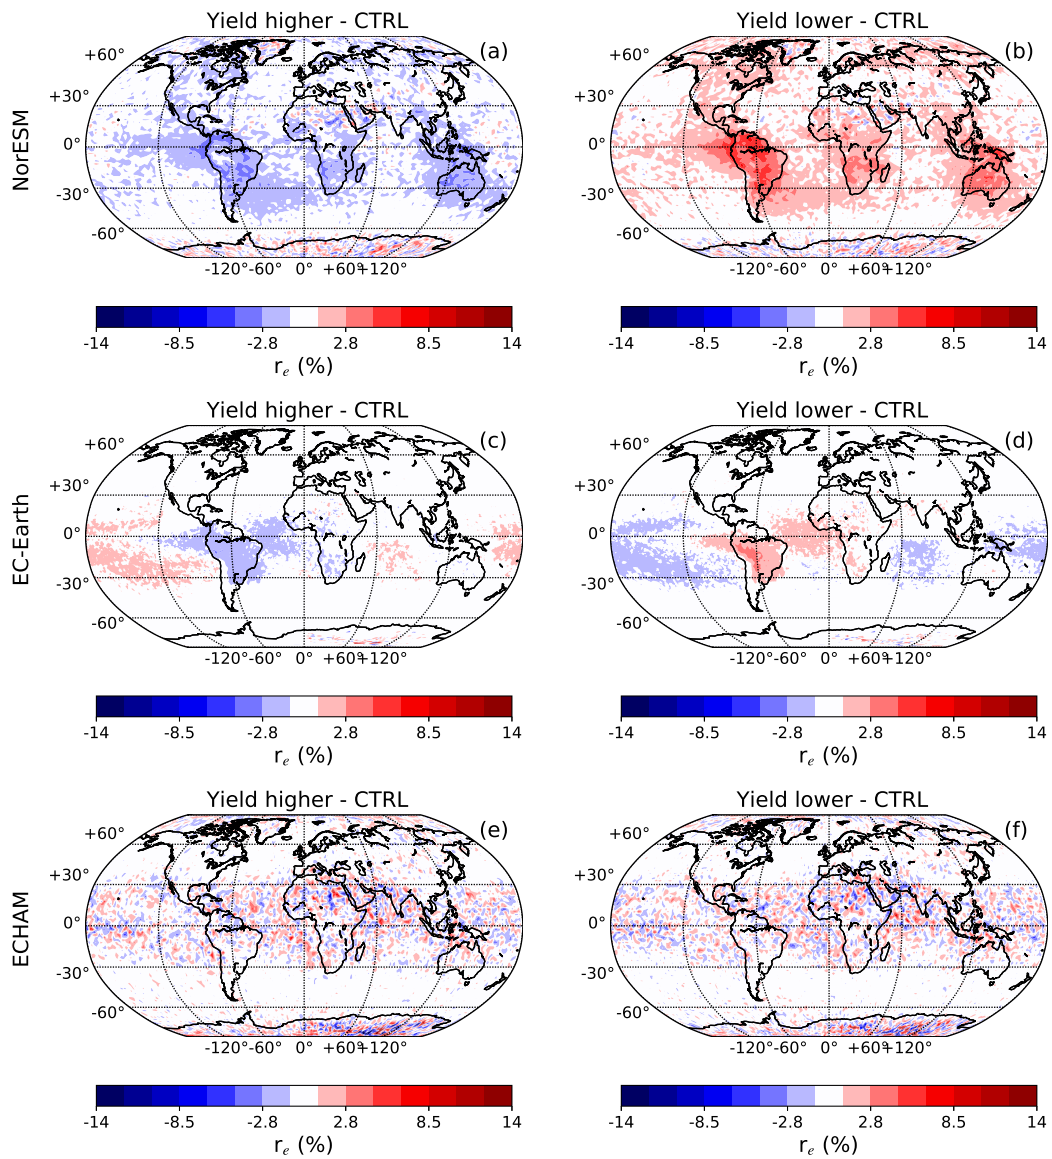

**Figure S6.** Maps of the difference in the average cloud cloud effective radius ( $r_e$ ) between the Yield higher (a, c and e) and Yield lower (b, d and f) with respect to the CTRL simulation. This is shown for NorESM (a and b), EC-Earth (c and d) and ECHAM (e and f).

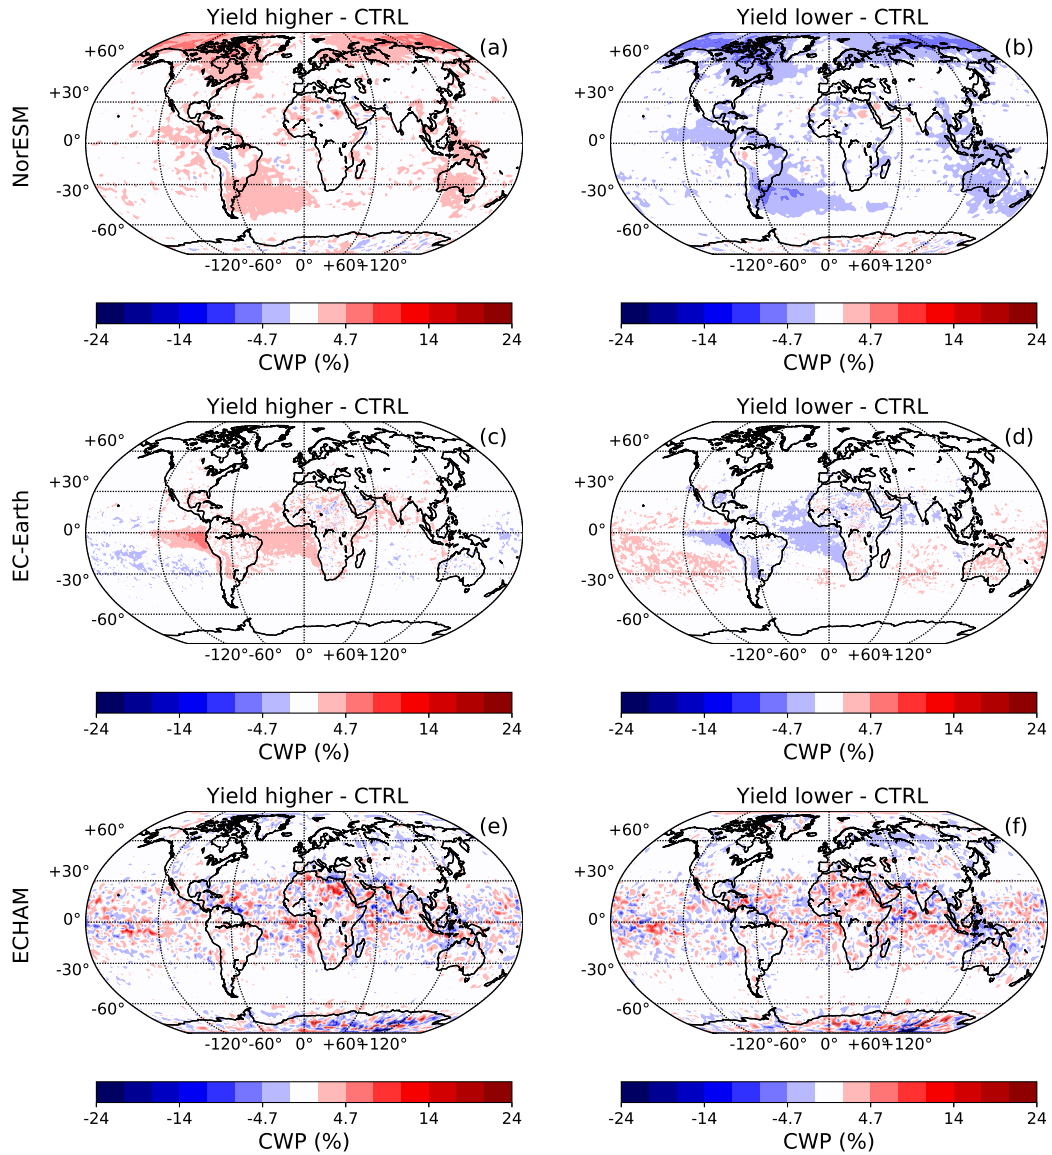

**Figure S7.** Maps of the difference in the average cloud water path (CWP) between the Yield higher (a, c and e) and Yield lower (b, d and f) with respect to the CTRL simulation. This is shown for NorESM (a and b), EC-Earth (c and d) and ECHAM (e and f).



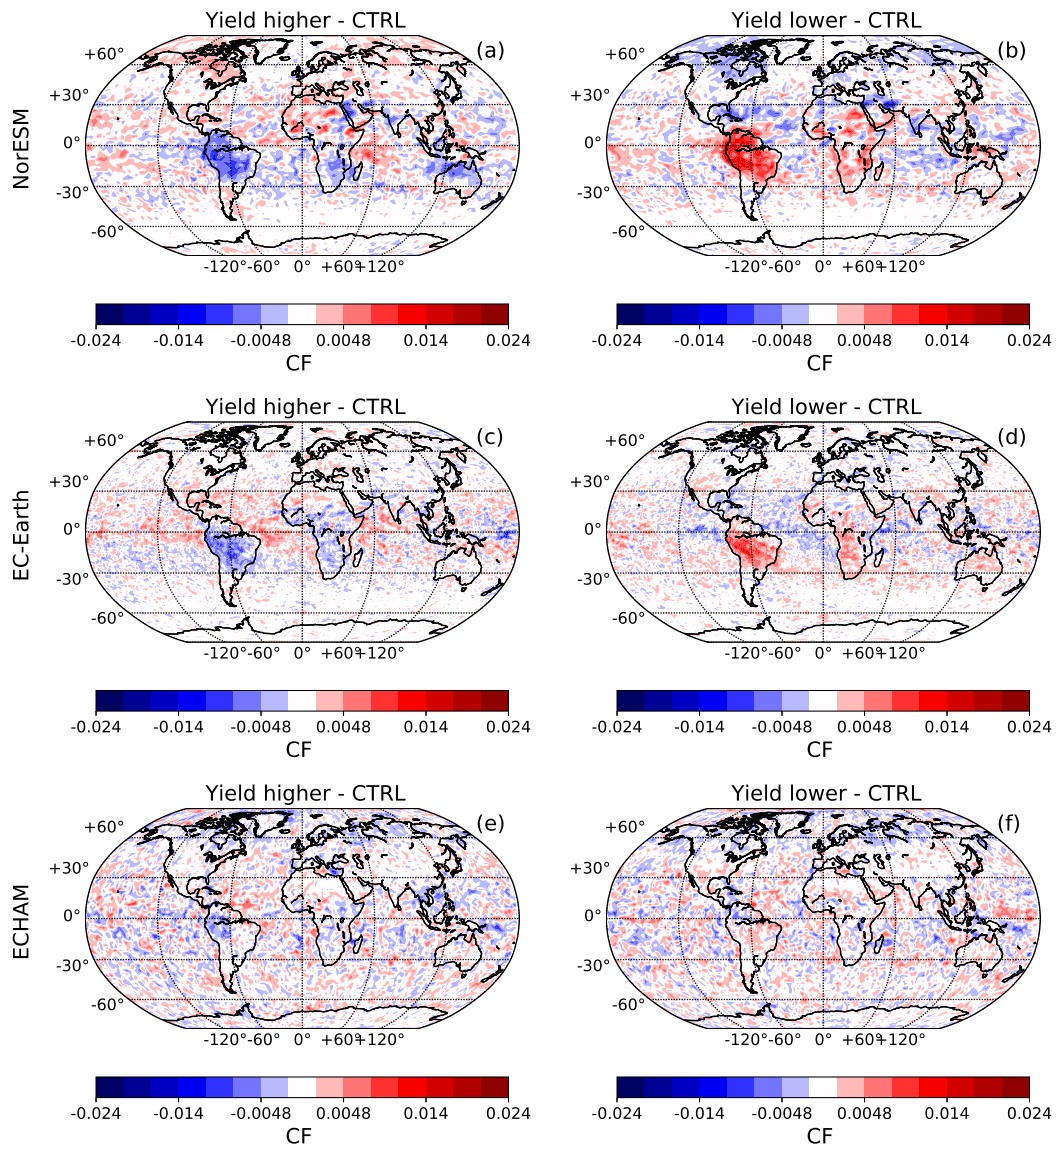

**Figure S8.** Maps of the difference in the average cloud fraction (CF) between the Yield higher (a, c and e) and Yield lower (b, d and f) with respect to the CTRL simulation. This is shown for NorESM (a and b), EC-Earth (c and d) and ECHAM (e and f).

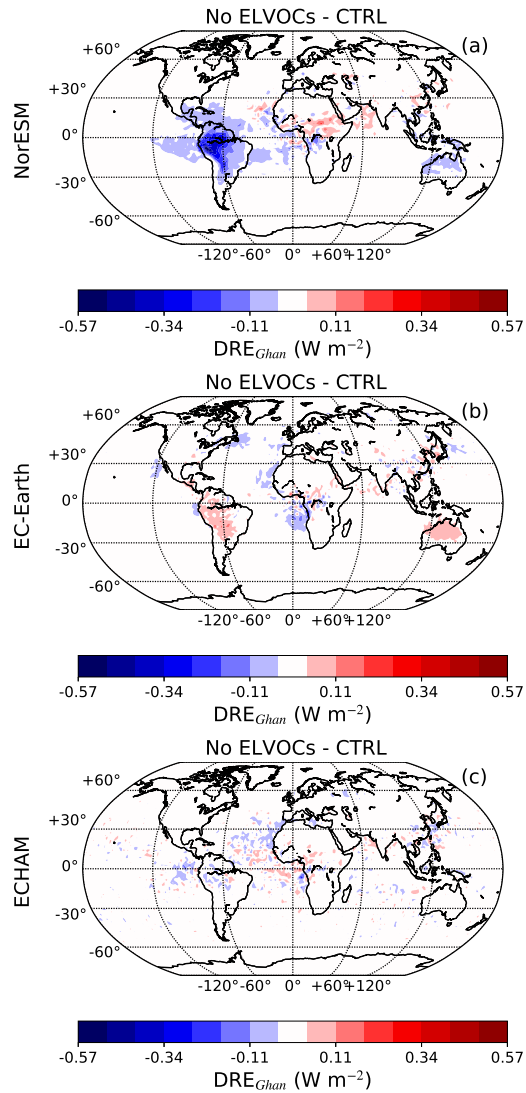

**Figure S9.** Maps of the difference in the average direct radiative effect ( $DRE_{Ghan}$ ) between the No ELVOCs and the CTRL simulation. This is shown for NorESM (a), EC-Earth (b) and ECHAM (c).

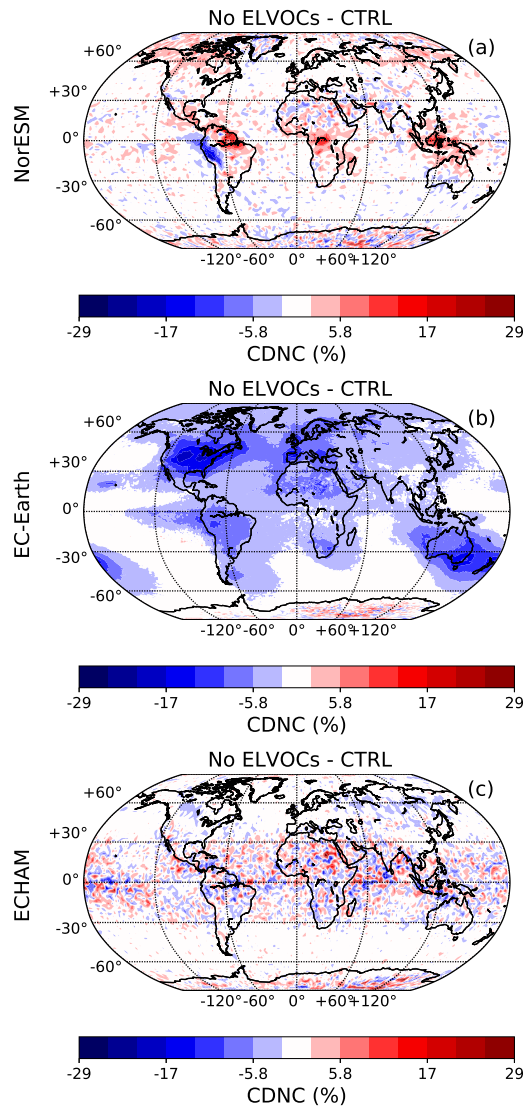

**Figure S10.** Maps of the difference in the average cloud droplet number concentration (CDNC) between the No ELVOCs and the CTRL simulation. This is shown for NorESM (a), EC-Earth (b) and ECHAM (c).

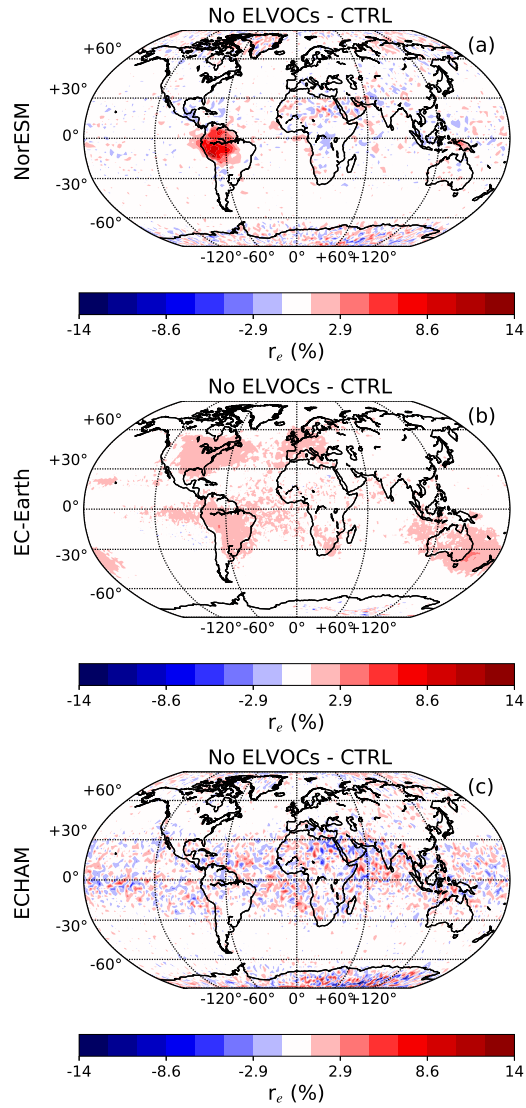

**Figure S11.** Maps of the difference in the average cloud effective radius ( $r_e$ ) between the No ELVOCs and the CTRL simulation. This is shown for NorESM (a), EC-Earth (b) and ECHAM (c).

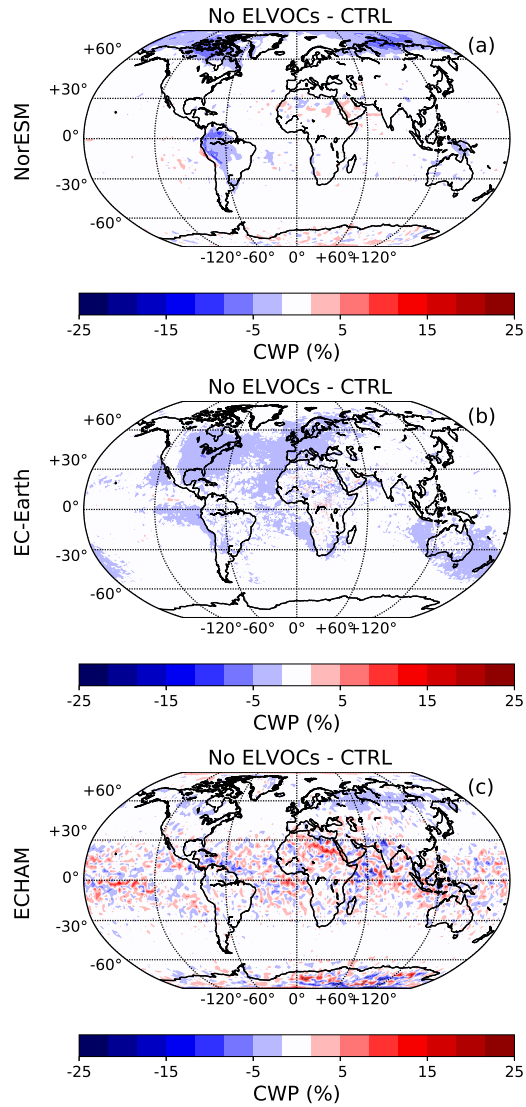

**Figure S12.** Maps of the difference in the average cloud water path (CWP) between the No ELVOCs and the CTRL simulation. This is shown for NorESM (a), EC-Earth (b) and ECHAM (c).

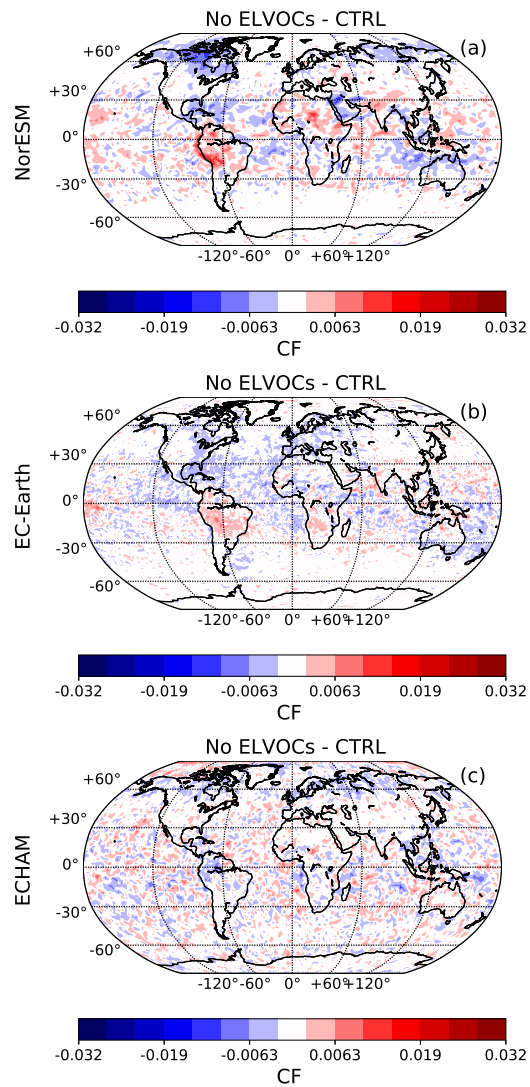

**Figure S13.** Maps of the difference in the average cloud fraction (CF) between the No ELVOCs and the CTRL simulation. This is shown for NorESM (a), EC-Earth (b) and ECHAM (c).

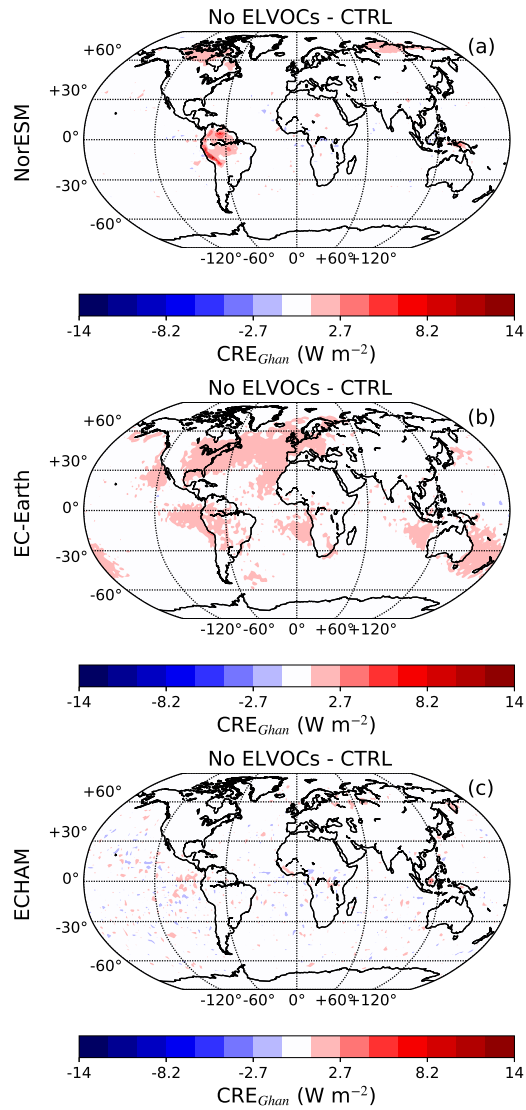

**Figure S14.** Maps of the difference in the average cloud radiative effect ( $CRE_{Ghan}$ ) between the No ELVOCs and the CTRL simulation. This is shown for NorESM (a), EC-Earth (b) and ECHAM (c).

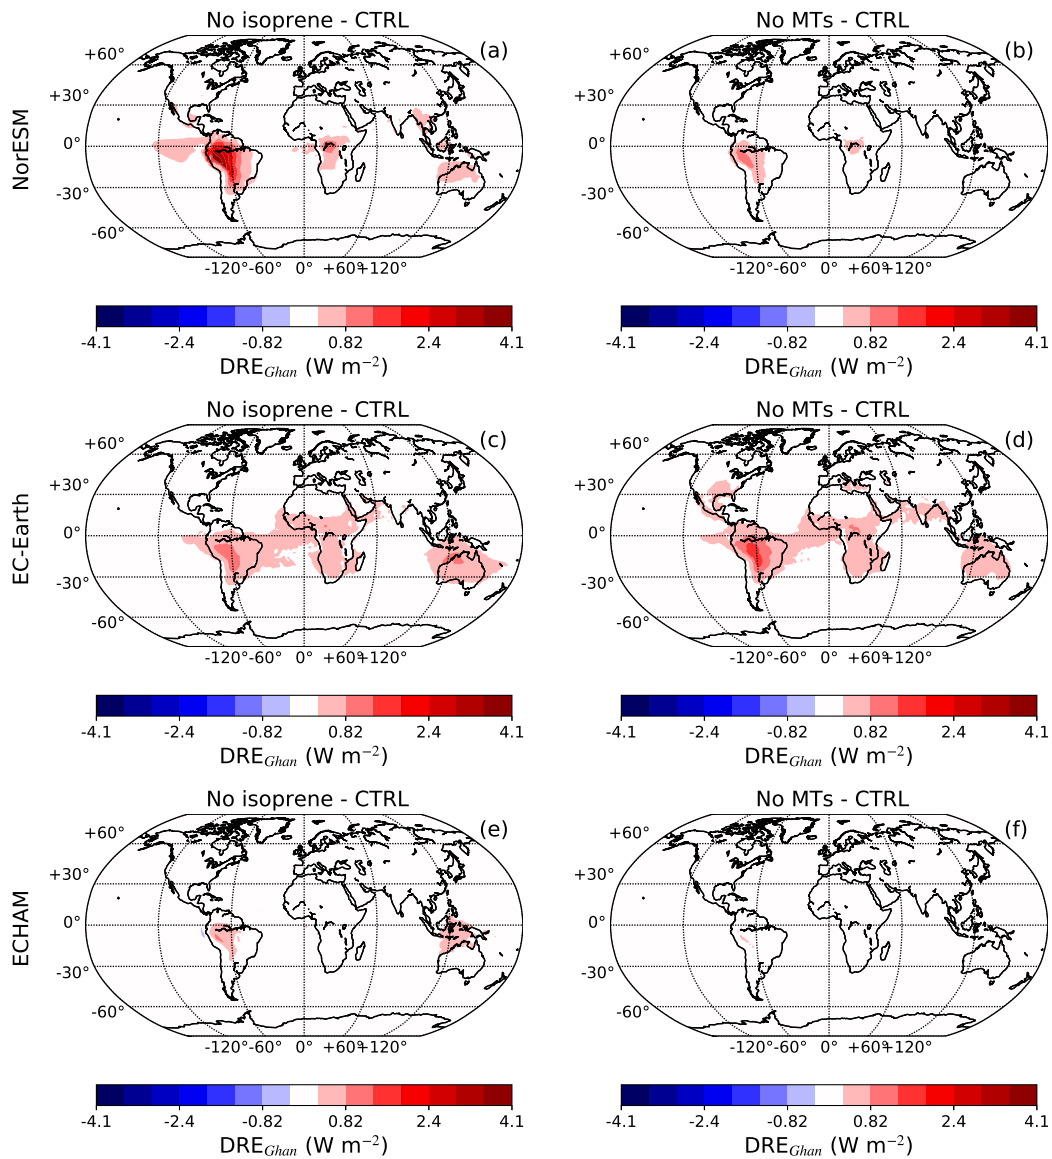

**Figure S15.** Maps of the difference in the average direct radiative effect ( $DRE_{Ghan}$ ) between the No isoprene (a, c and e) and No MTs (b, d and f) with respect to the CTRL simulation. This is shown for NorESM (a and b), EC-Earth (c and d) and ECHAM (e and f).



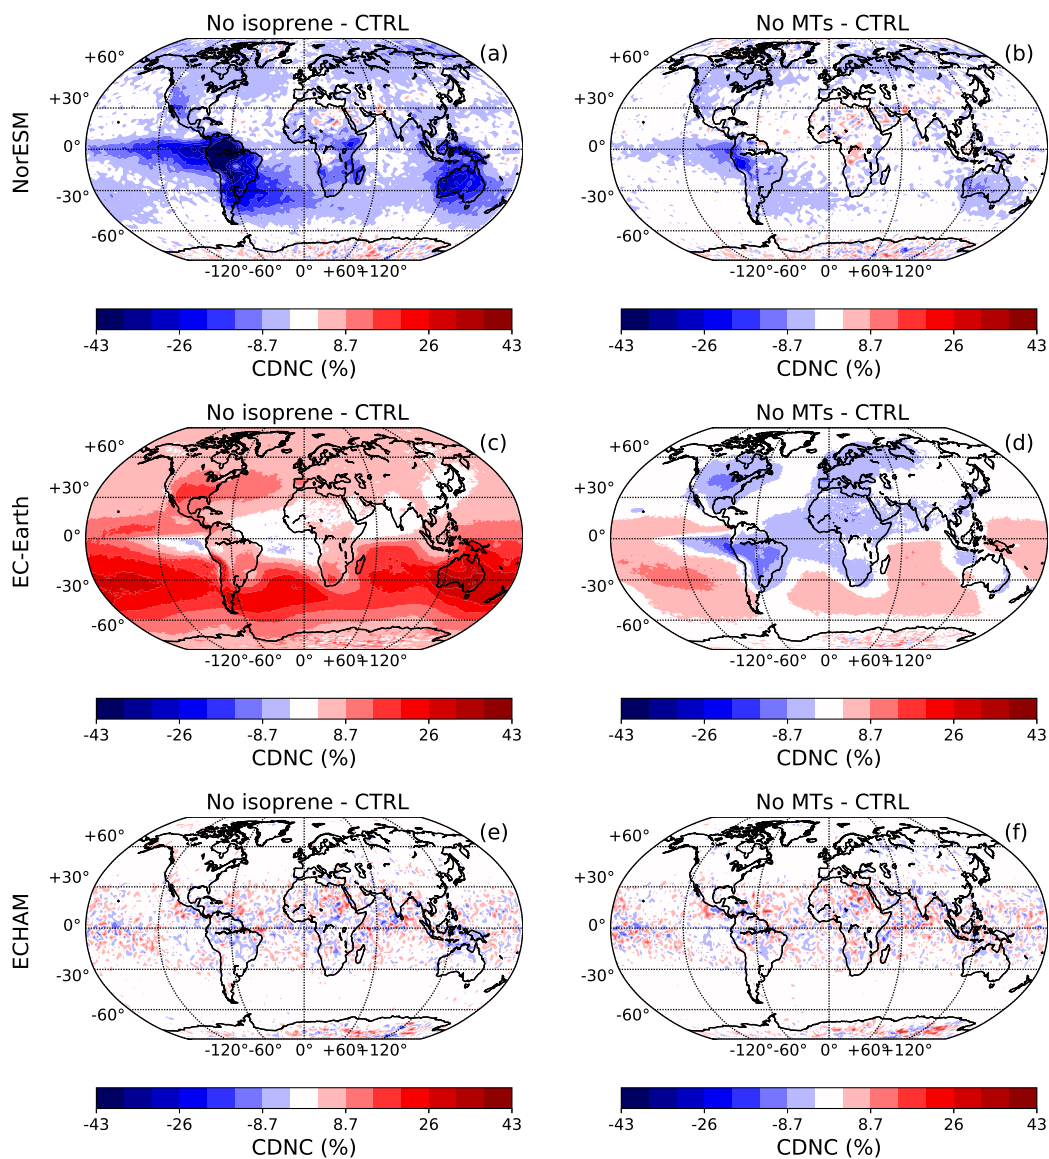

**Figure S16.** Maps of the difference in the average cloud droplet number concentration (CDNC) between the No isoprene (a, c and e) and No MTs (b, d and f) with respect to the CTRL simulation. This is shown for NorESM (a and b), EC-Earth (c and d) and ECHAM (e and f).

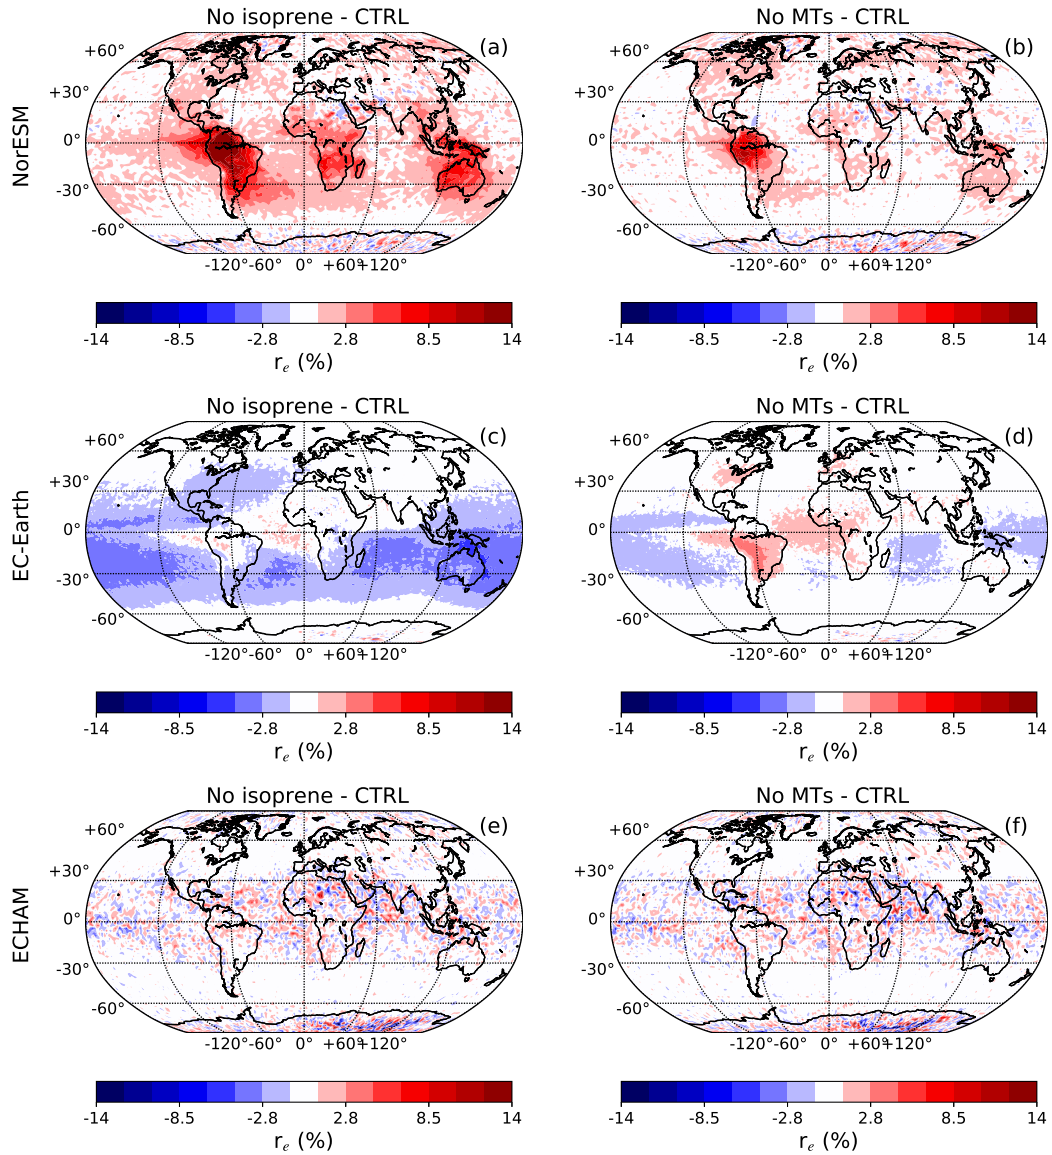

**Figure S17.** Maps of the difference in the average cloud effective radius ( $r_e$ ) between the No isoprene (a, c and e) and No MTs (b, d and f) with respect to the CTRL simulation. This is shown for NorESM (a and b), EC-Earth (c and d) and ECHAM (e and f).

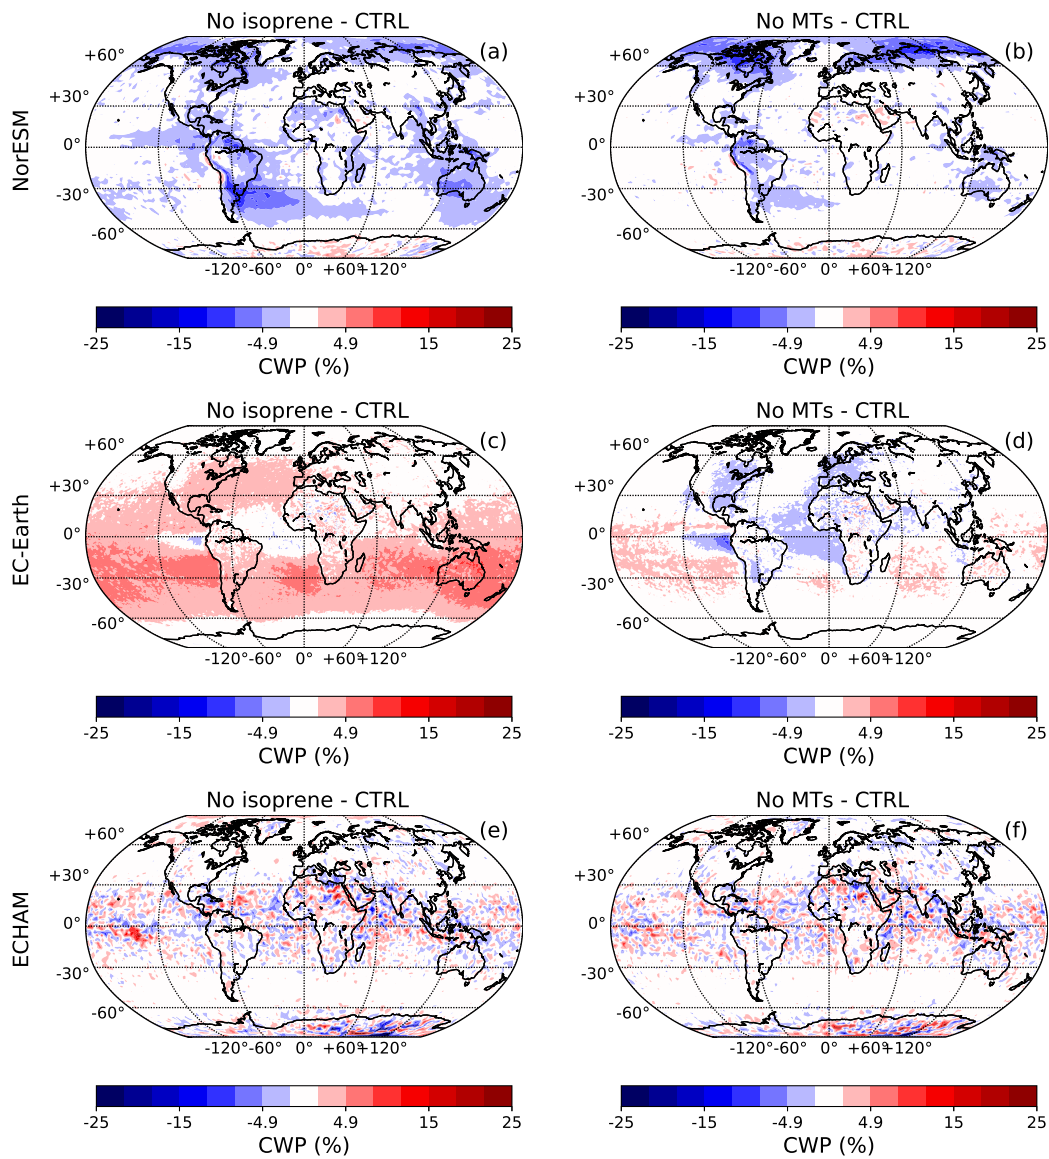

**Figure S18.** Maps of the difference in the average cloud water path (CWP) between the No isoprene (a, c and e) and No MTs (b, d and f) with respect to the CTRL simulation. This is shown for NorESM (a and b), EC-Earth (c and d) and ECHAM (e and f).

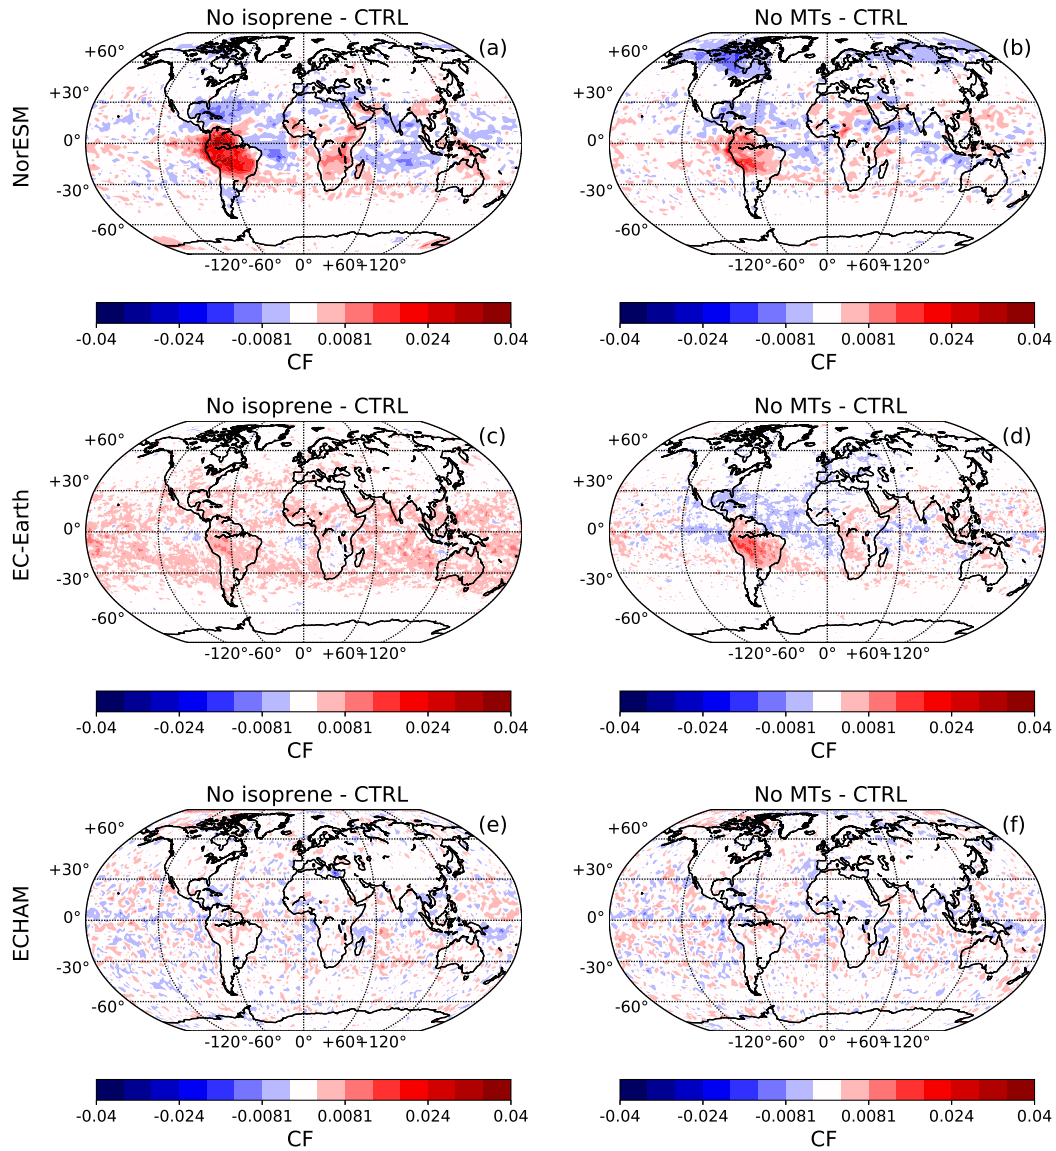

**Figure S19.** Maps of the difference in the average cloud fraction (CF) between the No isoprene (a, c and e) and No MTs (b, d and f) with respect to the CTRL simulation. This is shown for NorESM (a and b), EC-Earth (c and d) and ECHAM (e and f).

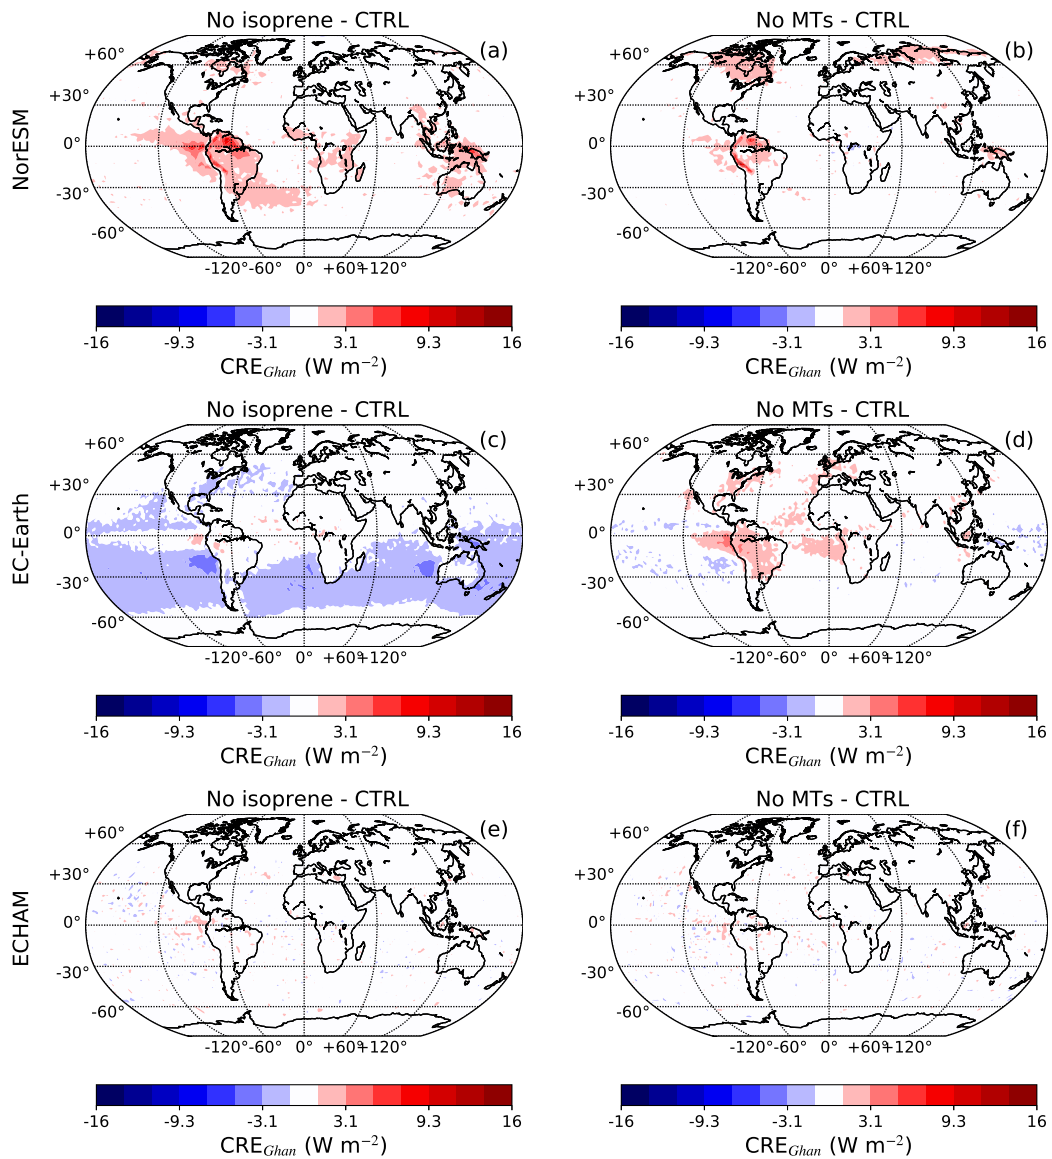

**Figure S20.** Maps of the difference in the average cloud radiative effect ( $CRE_{Ghan}$ ) between the No isoprene (a, c and e) and No MTs (b, d and f) with respect to the CTRL simulation. This is shown for NorESM (a and b), EC-Earth (c and d) and ECHAM (e and f).

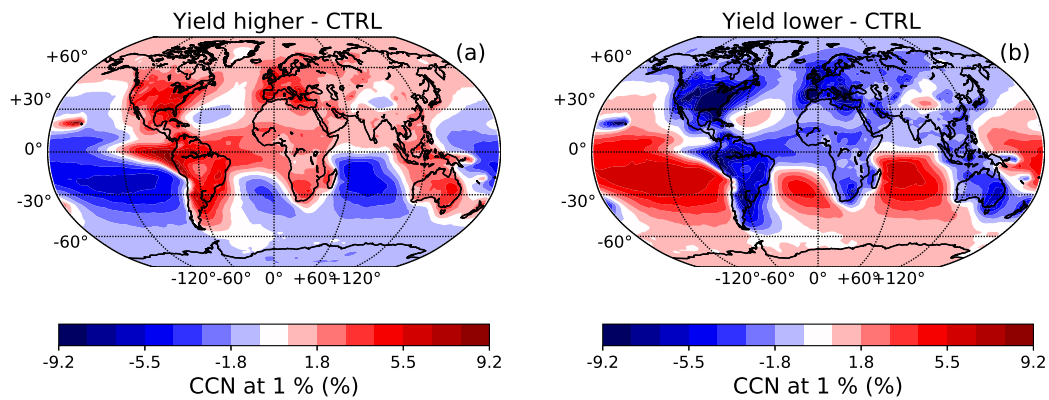

**Figure S21.** Maps of the difference in annually averaged cloud condensation nuclei at 1% supersaturation between the *Yield higher* and CTRL simulations (a) as well as the *Yield lower* and CTRL simulations (b) for EC-Earth. The CCN concentrations are averaged over for pressures over 850 hPa. The areas close to sources and remote are based on the changes in CCN concentrations in the *Yield lower* simulation (remote - positive and close to source - negative).
